# Supplementary material for: Impacts of NaHCO3 on β-Lactam Binding to PBP2a Protein Variants Associated with the NaHCO3-Responsive versus NaHCO3-Non-Responsive Phenotypes
Source: MDPI journal article supplement (doi:10.3390/antibiotics11040462), 2022-03-30
Supplement: s1 [file s1]

## Supplementary Materials

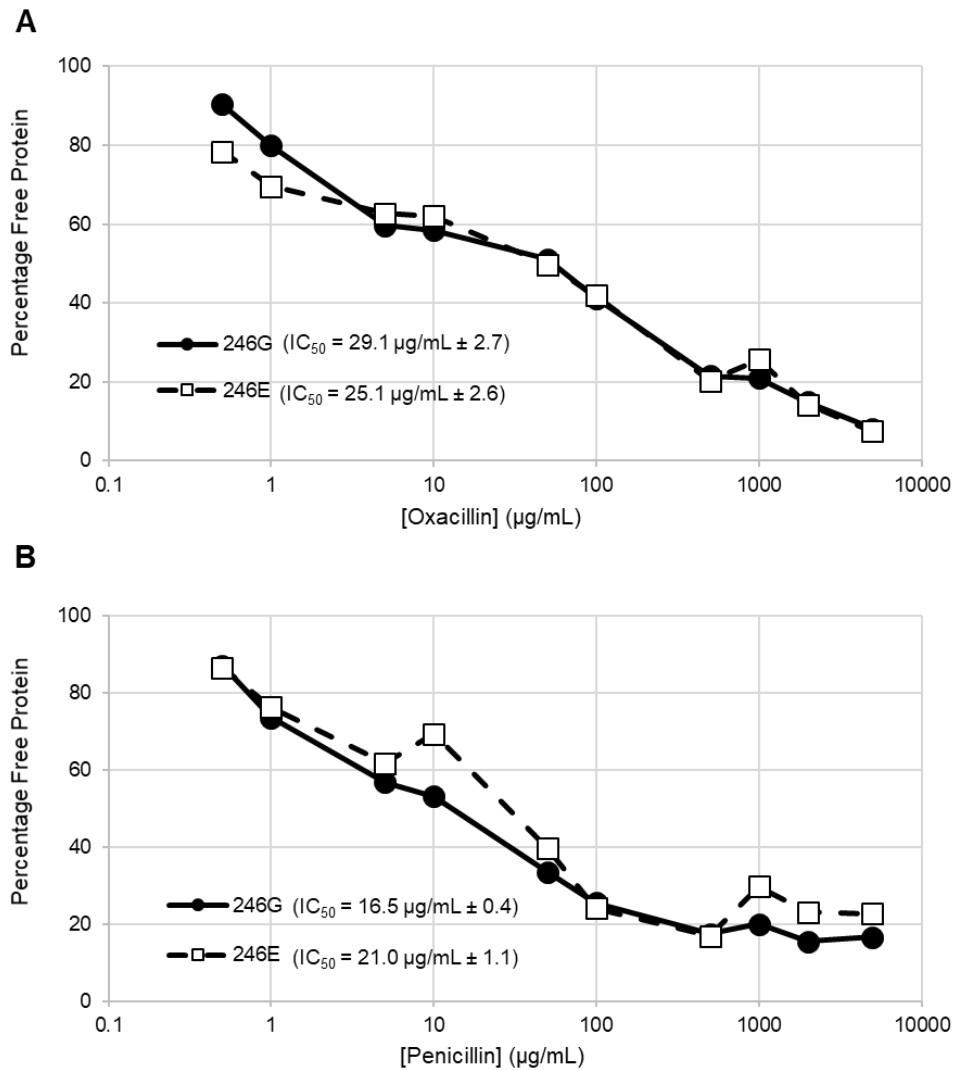

**Figure S1.** ‘Cold’ oxacillin (**A**) and penicillin (**B**) competition of Bocillin-FL binding to purified PBP2a variants (246G and 246E variants).

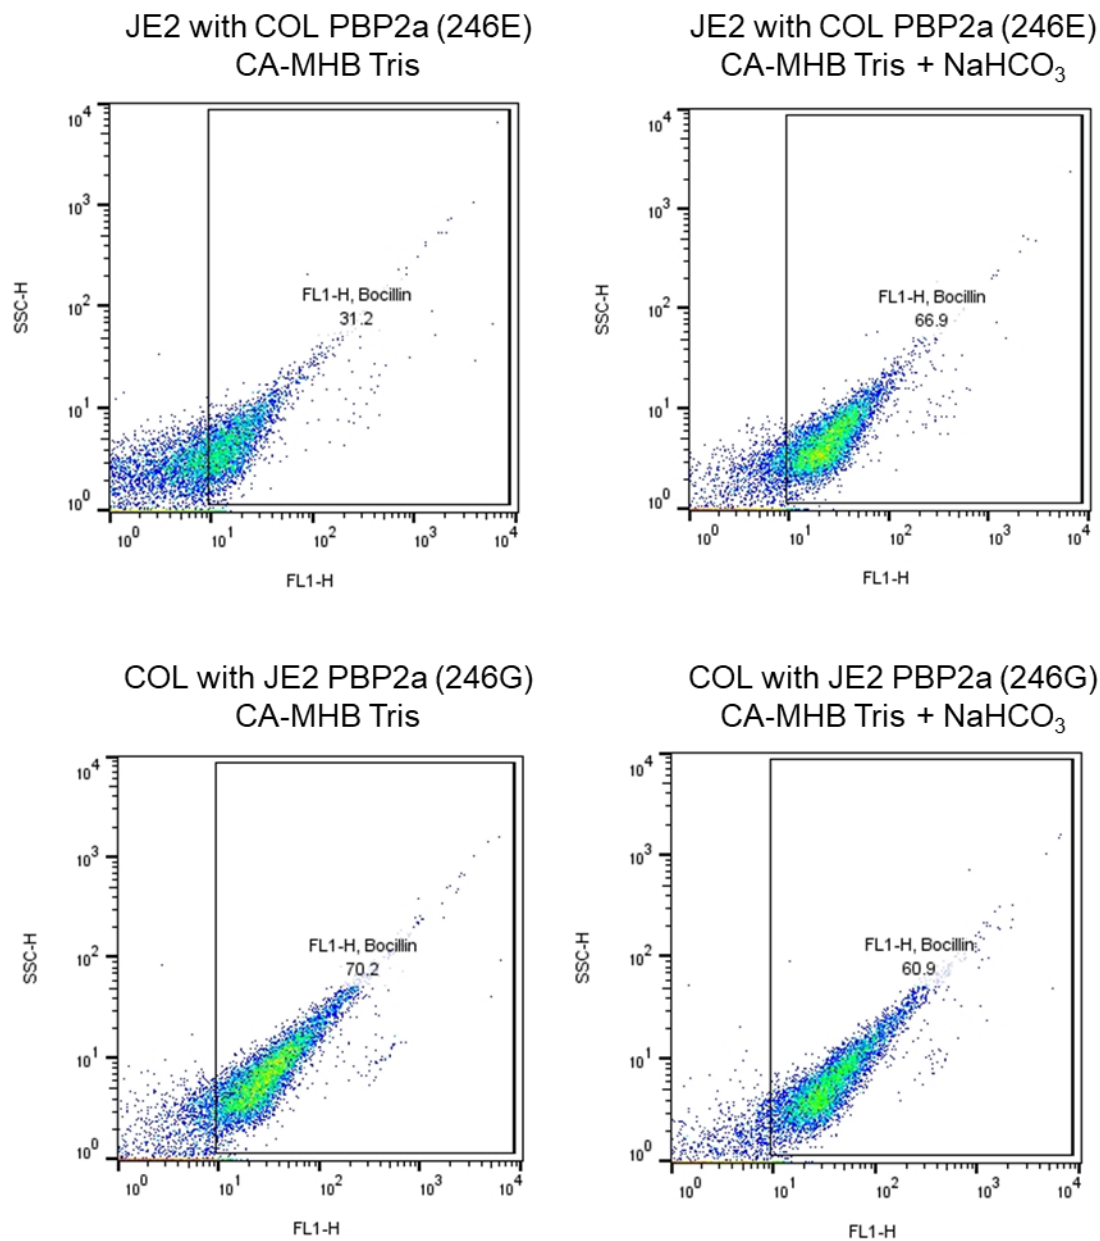

**Figure S2.** Representative dot plot images of JE2 and COL PBP2a swap strains grown in CA-MHB Tris  $\pm$   $\text{NaHCO}_3$ .

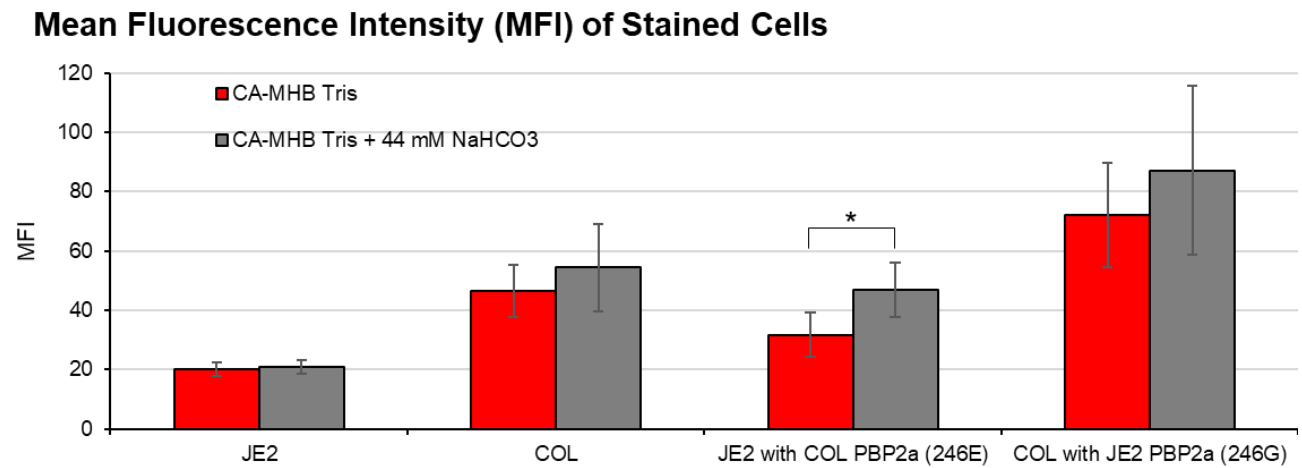

**Figure S3.** Mean fluorescence intensity of JE2 and COL whole cells stained with Bocillin-FL, following growth in CA-MHB Tris media, with and without NaHCO<sub>3</sub>. Statistics were calculated by a Student's *t*-test (\**P* < 0.05).

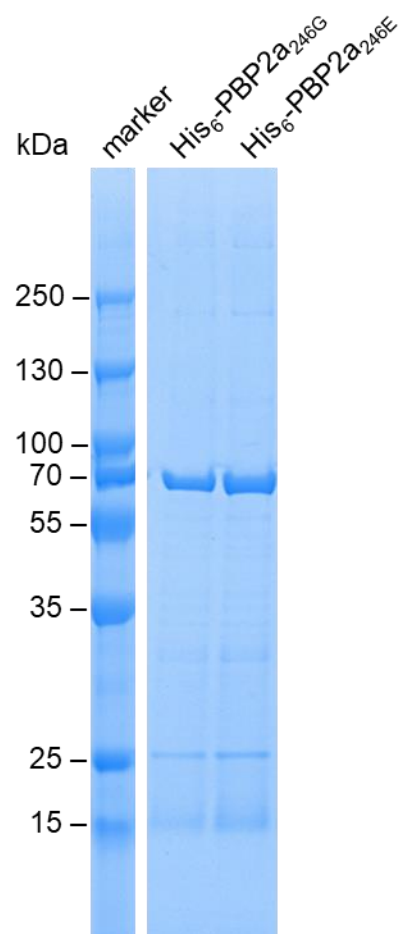

**Figure S4.** SDS-PAGE of purified PBP2a His<sub>6</sub>-tagged proteins.

**Table S1.** Oxacillin minimum inhibitory concentrations (MICs) for JE2, COL, and their *mecA* swap mutant MRSA strains. MIC determinations were performed in the presence of 2% NaCl.

| Strain                    | Oxacillin MIC (µg/mL) |                          |
|---------------------------|-----------------------|--------------------------|
|                           | Ca-MHB Tris           |                          |
|                           | Ca-MHB Tris           | 44 mM NaHCO <sub>3</sub> |
| JE2                       | 64                    | 1                        |
| COL                       | 512                   | 512                      |
| JE2 with COL PBP2a (246E) | 64                    | 2                        |
| COL with JE2 PBP2a (246G) | 512                   | 512                      |

**Table S2.** Oligonucleotides used for *mecA* sequencing, construction of His-tagged *mecA*<sub>246E</sub> and *mecA*<sub>246G</sub> plasmids, and construction of JE2 and COL *mecA* mutant variants.

| Primer designation | Name                    | Sequence (5' to 3')                     | Application                        |
|--------------------|-------------------------|-----------------------------------------|------------------------------------|
| None               | <i>mecA</i> F0          | ACCGAAGAAGTCGTGTCAGA                    | PCR amplification (for sequencing) |
| None               | <i>mecA</i> R2          | ACGTTGTAACCACCCCAAGA                    | PCR amplification (for sequencing) |
| None               | <i>mecA</i> F1          | ATTAACGTGGAGACGAGCACT                   | Sequencing                         |
| None               | <i>mecA</i> F2          | CGGTAACATTGATCGCAACG                    | Sequencing                         |
| None               | <i>mecA</i> R3          | TCGTCAACGATTGTGACACG                    | Sequencing                         |
| None               | <i>mecA</i> R4          | CGAAGGTATCATCTTGTACCCA                  | Sequencing                         |
| A                  | fwd_ <i>mecA</i> -Cterm | GATATACATATGGCTATGAAAAAGATAAAAATTGTTCCA | PBP2a protein purification         |
| B                  | rev_ <i>mecA</i> -Cterm | GTGGTGGTGGTGCTCTTCATCTATATCGTATTTTTTATT | PBP2a protein purification         |
| C                  | fwd_ <i>mecA</i> -Nterm | GGCAGCCATATGGCTATGAAAAAGATAAAAATTGTTCCA | PBP2a protein purification         |
| D                  | rev_ <i>mecA</i> -Nterm | GTGGTGGTGGTGCTCTTATTCATCTATATCGTATTTTTT | PBP2a protein purification         |
| E                  | fwd_pET21b/pET28b       | GAGCACCACCACCACCAC                      | PBP2a protein purification         |
| F                  | rev_pET21b              | AGCCATATGTATATCTCCTTC                   | PBP2a protein purification         |
| G                  | rev_pET28b              | AGCCATATGGCTGCCGCG                      | PBP2a protein purification         |

|      |                             |                                       |                   |
|------|-----------------------------|---------------------------------------|-------------------|
| None | 731                         | AAGAGAAGGATCCATCGTTACGGATTGCTTCACTGTT | Cloning           |
| None | 732                         | AAGAGAAGGATCCTTAACTGTTTTAGTTAACTCATGT | Cloning           |
| None | 733                         | AACCAAATCTTATGTGACATAATATTT           | PCR verification  |
| None | 734                         | GTAATCTGGAAGTTGTTGAGCAGA              | PCR verification  |
| None | 745 ( <i>mecA</i> 246G fwd) | TTC CTA GAG GAT AGT TAC GAC TTT CTG   | Mutagenesis AA246 |
| None | 746 ( <i>mecA</i> 246E fwd) | TTT CTA GAG GAT AGT TAC GAC TTT CTG   | Mutagenesis AA246 |
| None | 747 ( <i>mecA</i> 246 rev)  | AAG CGA CTT CAC ATC TAT TAG GTT A     | Mutagenesis AA246 |

---

**Table S3.** JE2 MICs ( $\mu\text{g/mL}$ )  
for Penicillin G and Bocillin-FL  
(Penicillin V conjugated to FL).

| Antibiotics  | Ca-MHB |
|--------------|--------|
| PEN G        | 2      |
| Bocillin -FL | 2      |
